# Supplementary material for: Assessing Non-Specific Neck Pain through Pose Estimation from Images Based on Ensemble Learning
Source: MDPI journal article supplement (doi:10.3390/life13122292), 2023-11-30
Supplement: s1 [file s1]

**Table S1.** The features used for training

| Features                   | Case Mean<br>Value | Control Mean<br>Value | P value<br>(U Test) | Selected<br>By Lasso |
|----------------------------|--------------------|-----------------------|---------------------|----------------------|
| Offset_Lshoulder_y_Mneck_2 | 0.009              | -0.007                | <0.001              | Y                    |
| Lshoulder_y_Mneck_2        | 0.006              | -0.017                | <0.001              | Y                    |
| OFFSET_Lshoulder_y_AVG_2   | -0.044             | -0.075                | <0.001              | Y                    |
| RAW_neck_x_AVG_3           | 0.493              | 0.527                 | <0.001              | Y                    |
| RAW_nose_x_AVG_3           | 0.475              | 0.516                 | <0.001              | Y                    |
| Offset_Rshoulder_y_Mneck_1 | -0.009             | 0.002                 | 0.001               | Y                    |
| RAW_Rshoulder_x_AVG_1      | 0.286              | 0.326                 | 0.001               | Y                    |
| Rshoulder_y_SD_0           | 0.019              | 0.014                 | 0.003               | Y                    |
| Yaw_Mild_Left_2            | 0.066              | 0.101                 | >0.05               | Y                    |
| Lshoulder_y_Mneck_0        | 0.003              | -0.013                | <0.001              |                      |
| RAW_Reye_x_AVG_3           | 0.437              | 0.478                 | <0.001              |                      |
| RAW_nose_x_AVG_0           | 0.482              | 0.518                 | <0.001              |                      |
| Lshoulder_y_SD_1           | 0.014              | 0.008                 | <0.001              |                      |
| RAW_Leye_x_AVG_3           | 0.525              | 0.561                 | <0.001              |                      |
| RAW_Rshoulder_x_AVG_0      | 0.285              | 0.326                 | 0.001               |                      |
| Offset_Shoulder_Diff_2     | 0.025              | 0.048                 | 0.001               |                      |
| RAW_Reye_x_AVG_0           | 0.439              | 0.475                 | 0.001               |                      |
| RAW_Reye_x_AVG_2           | 0.436              | 0.471                 | 0.001               |                      |
| nose_y_SD_1                | 0.022              | 0.014                 | 0.001               |                      |
| Leye_y_SD_1                | 0.021              | 0.013                 | 0.001               |                      |
| RAW_Leye_x_AVG_0           | 0.532              | 0.563                 | 0.001               |                      |
| height                     | 160.912            | 168.238               | 0.001               |                      |
| RAW_nose_x_AVG_2           | 0.476              | 0.513                 | 0.001               |                      |
| Reye_y_SD_1                | 0.021              | 0.013                 | 0.001               |                      |
| Rshoulder_y_SD_3           | 0.015              | 0.01                  | 0.001               |                      |
| RAW_Reye_x_AVG_1           | 0.446              | 0.479                 | 0.001               |                      |
| RAW_neck_x_AVG_0           | 0.499              | 0.528                 | 0.002               |                      |
| Leye_y_SD_0                | 0.025              | 0.017                 | 0.002               |                      |
| RAW_Leye_x_AVG_2           | 0.53               | 0.562                 | 0.002               |                      |
| RAW_Rshoulder_x_AVG_3      | 0.288              | 0.333                 | 0.002               |                      |
| nose_y_SD_3                | 0.022              | 0.013                 | 0.002               |                      |
| Lshoulder_y_Mneck_3        | 0.001              | -0.011                | 0.002               |                      |
| RAW_Rshoulder_x_AVG_2      | 0.284              | 0.323                 | 0.002               |                      |
| Offset_ABS_Shoulder_Diff_2 | 0.029              | 0.048                 | 0.002               |                      |
| OFFSET_Lshoulder_y_AVG_0   | -0.049             | -0.074                | 0.002               |                      |
| OFFSET_Lshoulder_y_AVG_3   | -0.049             | -0.069                | 0.002               |                      |
| Leye_y_SD_3                | 0.019              | 0.011                 | 0.002               |                      |
| Shoulder_Normal_1          | 0.568              | 0.269                 | 0.002               |                      |
| RAW_neck_x_AVG_2           | 0.5                | 0.529                 | 0.002               |                      |
| Offset_Lshoulder_y_Mneck_0 | 0.007              | -0.003                | 0.002               |                      |
| Shoulder_Imbalance_Left_2  | 0.097              | 0.41                  | 0.003               |                      |
| RAW_Lshoulder_x_AVG_3      | 0.68               | 0.713                 | 0.003               |                      |
| Offset_Shoulder_Diff_0     | 0.029              | 0.047                 | 0.003               |                      |
| Yaw_Moderate_Left_1        | 0.017              | 0.052                 | 0.003               |                      |
| Shoulder_Normal_0          | 0.689              | 0.412                 | 0.003               |                      |
| nose_y_SD_0                | 0.027              | 0.019                 | 0.003               |                      |

|                            |        |        |       |
|----------------------------|--------|--------|-------|
| Reye_y_SD_0                | 0.025  | 0.017  | 0.003 |
| Offset_ABS_Shoulder_Diff_0 | 0.032  | 0.048  | 0.004 |
| Reye_y_SD_3                | 0.019  | 0.012  | 0.004 |
| RAW_yaw_AVG_1              | 5.665  | 1.955  | 0.004 |
| OFFSET_Lshoulder_y_AVG_1   | -0.054 | -0.078 | 0.004 |
| Shoulder_Diff_0            | -0.011 | 0.004  | 0.004 |
| neck_y_SD_3                | 0.012  | 0.008  | 0.004 |
| RAW_nose_x_AVG_1           | 0.49   | 0.522  | 0.004 |
| Shoulder_Diff_2            | -0.015 | 0.005  | 0.004 |
| Lshoulder_y_SD_0           | 0.019  | 0.014  | 0.005 |
| Offset_ABS_Shoulder_Diff_1 | 0.029  | 0.044  | 0.005 |
| Leye_y_SD_2                | 0.02   | 0.013  | 0.005 |
| RAW_neck_x_AVG_1           | 0.506  | 0.53   | 0.005 |
| Offset_Shoulder_Diff_1     | 0.026  | 0.042  | 0.006 |
| RAW_Lshoulder_x_AVG_2      | 0.697  | 0.723  | 0.007 |
| Yaw_Severe_Right_1         | 0.008  | 0.001  | 0.007 |
| Lshoulder_y_Mneck_1        | 0.002  | -0.01  | 0.007 |
| RAW_yaw_AVG_0              | 6.367  | 2.98   | 0.008 |
| RAW_Lshoulder_x_AVG_0      | 0.694  | 0.719  | 0.008 |
| OFFSET_neck_y_AVG_1        | -0.038 | -0.054 | 0.008 |
| neck_y_SD_1                | 0.011  | 0.007  | 0.008 |
| nose_y_SD_2                | 0.022  | 0.015  | 0.009 |

Abbreviation of components of features: RAW: raw feature generated from TF Pose or FSA net; Offset: offset features generated by raw feature subtracting the subject's baseline value; \_Mneck: normalized features generated by reset the original point (0,0) with the subject's neck position; \_[0/1/2/3]: features generated from whole/typing/gaming/video-watching tasks, respectively; [R/L][shoulder/eye]: Right/Left Shoulder/Eye; [eye/nose/neck/shoulder]\_[x/y]: the average value of x/y-coordinate of images from eye/nose/neck/shoulder; Shoulder\_[Normal/Imbalance]: status feature of shoulders; Shoulder\_Diff: the difference between the height (y-coordinate) of two shoulders; [Yaw/Pitch/Roll]\_AVG: the average value of angles of images from yaw, pitch, and roll; [Yaw/Pitch/Roll]\_[Normal/Mild/Moderate/Severe]\_[Right/Left]: head pose features generated from the proportions of angle values located in 7 intervals based on the subject's overall distribution in a task segmented by one, two and three standard deviations and annotated with head direction (right/left); ABS: the absolute value of the feature; SD: the standard deviation of the features.
